# Supplementary material for: Unique Biological Properties of Catalytic Domain Directed Human Anti-CAIX Antibodies Discovered through Phage-Display Technology
Source: PubMed Central journal article supplement (PMC2835754; doi:10.1371/journal.pone.0009625), 2010-03-10

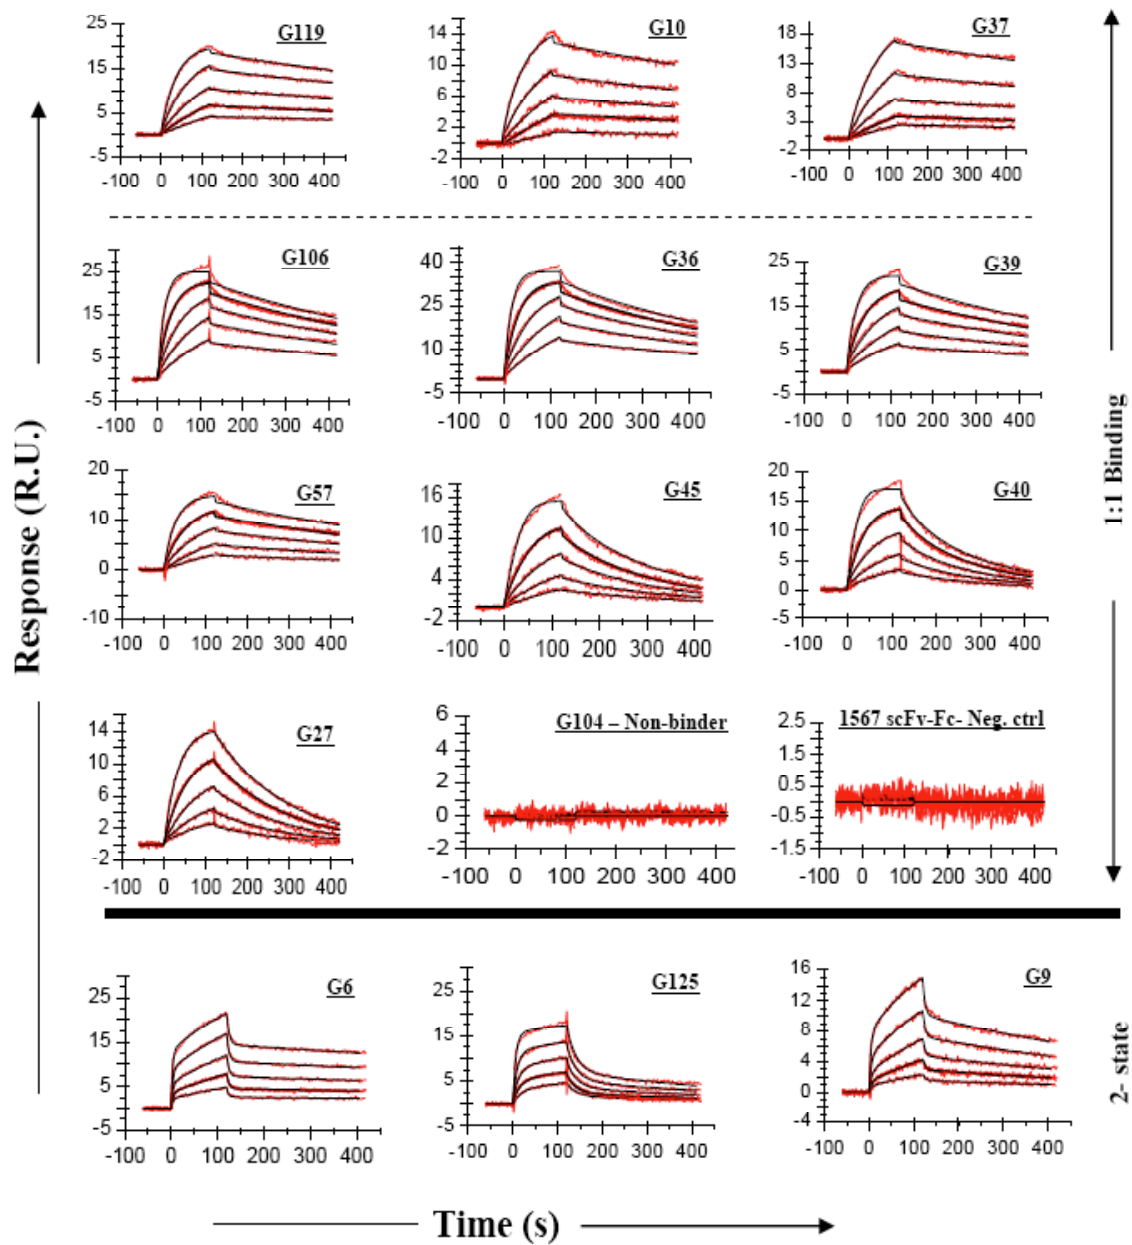

Supplement: pone.0009625.s001.pdf [file pone.0009625.s001.pdf]
