# Supplementary material for: Unique Biological Properties of Catalytic Domain Directed Human Anti-CAIX Antibodies Discovered through Phage-Display Technology
Source: PubMed Central journal article supplement (PMC2835754; doi:10.1371/journal.pone.0009625), 2010-03-10
Supplement: pone.0009625.s002.pdf [file pone.0009625.s002.pdf]

**Table S1. Sequence analysis of CAIX-specific antibodies including V and J germline gene usage**

**A. Heavy Chain Variable Region**

|     | 10 20 30 40 50 60 70 80 90 100 110 |                |                      |                    |                           |               |                     | Germline         |              |  |
|-----|------------------------------------|----------------|----------------------|--------------------|---------------------------|---------------|---------------------|------------------|--------------|--|
|     | QVQLVQSGGGLVQP...<br>SYAMS         | WVROAPGKGLEWVS | AISGSGGX...<br>AN..T | RFTISRDN...<br>abc | N-GN--YR...<br>abcde      | WGQGLTVTVSS   | VH gene             | JH gene          | V&J Mutation |  |
| G11 | .....P..                           | .....          | ..AN..T              | .....              | .....                     | .....M.....   | V <sub>H</sub> 3-23 | J <sub>H</sub> 3 | 7            |  |
| G10 | .....P..                           | .....          | ..AN..T              | .....              | .....                     | .....M.....   | V <sub>H</sub> 3-23 | J <sub>H</sub> 3 | 7            |  |
| G45 | .....P..                           | .....          | ..AN..T              | .....              | .....                     | .....M.....   | V <sub>H</sub> 3-23 | J <sub>H</sub> 3 | 7            |  |
| G37 | .....V.....P..                     | .....          | ..AN..T              | .....              | .....                     | .....M.....   | V <sub>H</sub> 3-23 | J <sub>H</sub> 3 | 8            |  |
| G10 | E.....                             | .....          | ..AN..T              | .....              | .....                     | .....T.....   | V <sub>H</sub> 3-23 | J <sub>H</sub> 3 | 5            |  |
| G36 | E.....V.....P..                    | .....          | ..AN..T              | .....              | .....                     | .....M.....   | V <sub>H</sub> 3-23 | J <sub>H</sub> 3 | 7            |  |
| G57 | .....                              | .....          | ..VS.....            | .....              | .....K                    | YCSSTSCYRGM.V | V <sub>H</sub> 3-23 | J <sub>H</sub> 6 | 3            |  |
| G40 | .....                              | .....          | .....S.....          | .....              | .....T                    | Y..D...Y.SL.Y | V <sub>H</sub> 3-23 | J <sub>H</sub> 4 | 3            |  |
| G6  | .....E..G                          | T..T           | ..V.....S.....       | .....              | .....R.....R              | GPV...L.YG... | V <sub>H</sub> 3-23 | J <sub>H</sub> 3 | 10           |  |
| G10 | ..QE.....                          | I.....         | .....G..H.....       | .....              | .....K                    | F.SA...S.-Y.L | V <sub>H</sub> 3-23 | J <sub>H</sub> 5 | 5            |  |
| G39 | ..QE.....                          | .....          | .....S.....          | .....              | .....K                    | I..R...SSSLGY | V <sub>H</sub> 3-23 | J <sub>H</sub> 4 | 2            |  |
| G9  | ..QE.....                          | .....          | .....S.....          | .....              | .....R                    | SHSS...G..Y   | V <sub>H</sub> 3-23 | J <sub>H</sub> 4 | 2            |  |
| G27 | ..KE...V...T                       | N...T          | .....G               | L..YD.SV.H.T       | .....A..S.....T...D.....R | -..S...-YQEH  | V <sub>H</sub> 3-30 | J <sub>H</sub> 4 | 15           |  |
| G12 | E...E...V...R                      | ..G.H          | .....S.....          | .....              | .....R                    | --AAVT.G..P   | V <sub>H</sub> 3-23 | J <sub>H</sub> 1 | 6            |  |

**B. Light Chain Variable Region**

|      | 10 20 30 40 50 60 70 80 90 100       |                 |               |                                 |                |             |         | Germline                                        |              |  |
|------|--------------------------------------|-----------------|---------------|---------------------------------|----------------|-------------|---------|-------------------------------------------------|--------------|--|
|      | QSVLTQPPSVSGAPG...<br>TGSSSNIGAGYDVH | WYQQLPGTAPKLLIY | GNXNRPS       | GVPDRFSGSKGTSASLAITGLQAEDEADYYC | QSYDSSLXAW-V   | FGGGTKLTVL  | vλ gene | Jλ gene                                         | V&J Mutation |  |
| G119 | .....                                | .....           | ..T.....      | .....I...D.....                 | .....T.RV..M   | .....       | V1-40   | J <sub>L</sub> 3                                | 6            |  |
| G10  | .....                                | .....           | ..S.....      | .....S.....H...                 | .....R..S-..   | .....       | V1-40   | J <sub>L</sub> 3                                | 4            |  |
| G45  | .....I.....                          | ..T.....        | ..N.....      | .....S.....                     | .....K..S-..   | .....       | V1-40   | J <sub>L</sub> 3                                | 9            |  |
| G37  | .....                                | ..H.....        | ..S.....      | .....T..F.....                  | .....S.....    | .....V...   | V1-40   | J <sub>L</sub> 2/ J <sub>L</sub> 3 <sup>a</sup> | 4            |  |
| G106 | .....F.....                          | .....R.....     | ..N.....      | .....T..F.....                  | .....S.....    | .....V...   | V1-40   | J <sub>L</sub> 2/ J <sub>L</sub> 3 <sup>a</sup> | 6            |  |
| G36  | .....F.....                          | .....           | ..T.....      | .....T.....                     | .....R..S..... | .....       | V1-40   | J <sub>L</sub> 3                                | 5            |  |
| G57  | .....                                | .....           | A.N.....      | .....                           | .....R.....    | .....A..... | V1-40   | J <sub>L</sub> 3                                | 4            |  |
| G40  | .....                                | .....           | A.N.....      | .....                           | .....R.....    | .....A..... | V1-40   | J <sub>L</sub> 3                                | 4            |  |
| G6   | .....I.....                          | ..R...D.....    | A.N.....      | ..G..A.....S.....               | .....R.....    | .....A..... | V1-40   | J <sub>L</sub> 3                                | 10           |  |
| G104 | .....                                | ..R..N.....     | D.T.....      | ..A...A...T...D.....            | .....G.R.....  | .....L..... | V1-40   | J <sub>L</sub> 3                                | 11           |  |
| G39  | .....                                | ..R..N.....     | D.T.....      | ..A...A...D...D.....            | .....G.R.....  | .....L..... | V1-40   | J <sub>L</sub> 3                                | 10           |  |
| G9   | .....                                | ..R..N.....     | ..T.....      | .....G.....                     | .....R.....    | .....       | V1-40   | J <sub>L</sub> 3                                | 5            |  |
| G27  | LP.....V...TAR.T                     | G--N...SK-S..   | ..K..Q..V.V.. | YDSD...I.E--N..NT.T.T.SRVE.G    | ..VW...SDHHV.  | .....       | V3-21   | J <sub>L</sub> 2/ J <sub>L</sub> 3 <sup>a</sup> | 4            |  |
| G125 | ..PG.....V...TAR.T                   | G--D...RK-S..   | ..R..Q..I.V.R | DDRD...I.E...S.VNT.T.I.SRVE.G   | ..VW...SKHY..  | ..P...V.A.  | V3-21   | J <sub>L</sub> 1                                | 14           |  |

“.” = Matches exactly to consensus  
 “.” = filler space  
 “X” = in consensus is various AA  
 “C” = Consensus  
 The linker in G40, G57, G119 all have one AA change  
 “V&J Mutation” = # of V&J mutations from the germline  
<sup>a</sup> These genes are equally homologous to both germlines
